# Supplementary material for: Oxidized covalent organic frameworks with enhanced local polarization for superior photocatalytic production of hydrogen peroxide
Source: Royal Society of Chemistry journal article supplement (doi:10.1039/d4ta08977d), 2025-01-01
Supplement: d4ta08977d1.pdf [file d4ta08977d1.pdf]

# **Oxidized Covalent Organic Frameworks with Enhanced Local Polarization for Superior Photocatalytic Production of Hydrogen Peroxide**

*Huaji Pang<sup>a</sup>, Mengna Tan<sup>a</sup>, Tao Guo<sup>a</sup>, Zhiguo Zhang<sup>b</sup>, Yanqiu Zhu<sup>a</sup>, Chizhu Ding<sup>a\*</sup>, Mingkui Wang<sup>b</sup>, Yonggang Xiang<sup>a</sup>, Dekang Huang<sup>a\*</sup>*

<sup>a</sup>College of Chemistry, Huazhong Agricultural University, Wuhan 430070, PR China

<sup>b</sup>Wuhan National Laboratory for Optoelectronics, Huazhong University of Science and Technology, Wuhan 430074, China

E-mail: [dingchizhu@mail.hzau.edu.cn](mailto:dingchizhu@mail.hzau.edu.cn) (C. Ding), [huangdekang@mail.hzau.edu.cn](mailto:huangdekang@mail.hzau.edu.cn) (D. Huang)

## Table of Contents

|                                                |    |
|------------------------------------------------|----|
| 1. General information .....                   | 1  |
| 1.1 Chemicals .....                            | 1  |
| 1.2 Characterization methods .....             | 1  |
| 1.3 Electrochemical measurements .....         | 2  |
| 1.4 Photocatalytic reaction .....              | 3  |
| 1.5 Measurement of AQY and SCC .....           | 4  |
| 1.6 Theoretical computation details .....      | 5  |
| 2. Synthetic procedures .....                  | 5  |
| 2.1 Synthesis of NQ-COF <sub>S1</sub> .....    | 5  |
| 2.2 Synthesis of NQ-COF <sub>S1</sub> -O ..... | 6  |
| 3. Characterization .....                      | 7  |
| 4. References .....                            | 21 |

## **1. General information**

### **1.1 Chemicals**

Unless otherwise stated, all the chemicals were purchased in analytical purity from commercial suppliers and used directly without further purification.

### **1.2 Characterization methods**

Powder X-ray diffraction (PXRD) patterns were collected on a Bruker D8 Advance diffractometer with Cu K $\alpha$  radiation ( $2\theta$  range: 2-40°; Scan step size: 0.02°; Time per step: 1 s). Fourier transform infrared (FT-IR) spectra were obtained using a Nicolet 6700 spectrometer (Thermo Scientific, USA) equipped with an ATR cell. The specific Brunauer-Emmett-Teller (BET) surface area and pore size distribution were recorded at 77 K with a Micromeritics ASAP 2040 instrument. Transmission electron microscopy (TEM) images were acquired using a Talos F200x instrument at an accelerating voltage of 200 kV. Scanning electron microscopy (SEM) images were acquired using a Hitachi SU 8010 microscope. X-ray photoelectron spectroscopy (XPS) measurements were conducted on a Thermo ESCALAB 250XI spectrometer using non-monochromatic Al K $\alpha$  X-rays as the excitation source, with C 1s (284.6 eV) as the reference line. Solid-state diffuse reflectance Ultraviolet–visible (UV-vis) spectra were acquired using a Perkin-Elmer LAMBDA 650S spectrophotometer with BaSO<sub>4</sub> as the reference. Photoluminescence (PL) spectra were recorded on a Shimadzu RF-5301PC spectrophotometer. Photoluminescence lifetime was measured using the time-correlated single photon counting method (FluoTime 250, Germany). Free radicals were tested by the Electron paramagnetic resonance (EPR) spectrometer (MS5000X,

Bruker, UK). In situ infrared spectra were obtained using diffuse reflectance infrared fourier transform spectroscopy (DRIFTS) (Nicolet iS50, Thermo Scientific, USA). Temperature-dependent photoluminescence spectra were recorded on a Fluorolog QM spectrophotometer (Horiba, Japan) over a temperature range from 80 to 300 K with an excitation wavelength ( $\lambda_{\text{ex}}$ ) of 375 nm. The concentrations of FF and FA were analyzed by the high-performance liquid chromatography (HPLC) (Agilent 1290 Infinity II HDR-DAD).

### 1.3 Electrochemical measurements

Electrochemical measurements were carried out with a CHI 760E workstation (Chenhua Instruments, China) using a standard three-electrode system. Typically, 15 mg of COFs, 1 mL of isopropanol and 50  $\mu\text{L}$  of 5% Nafion solution were mixed together, and 200  $\mu\text{L}$  of this mixture was coated on a ITO glass ( $10 \times 15 \times 1.1$  mm), which was employed as the working electrodes. Pt plate was utilized as the counter electrode and Ag/AgCl electrode as the reference electrode. 0.1 M  $\text{Na}_2\text{SO}_4$  aqueous solution was employed as the electrolyte for the photocurrent test, while the aqueous solution of 0.1 M KCl and 0.005 M  $\text{K}_3[\text{Fe}(\text{CN})_6]$  was employed as the electrolyte for the electrochemical impedance spectroscopy (EIS) measurement. For Mott-Schottky tests, the perturbation was set to be 5 mV with frequencies of 1000, 2000, and 3000 Hz.

Rotating ring-disk electrode (RRDE) tests were also performed on the CHI 760E workstation (Chenhua Instruments, China), and the standard three-electrode system included a platinum plate as the counter electrode, a commercial Hg/HgO electrode as the reference electrode, and a catalyst-coated glassy carbon as the working electrode.

0.1 M KOH aqueous solution was employed as the electrolyte. RRDE tests were carried out at a scan rate of 10 mV s<sup>-1</sup> and a rotation rate of 1600 rpm, and the ring potential was set to be 0.7 V (vs. Hg/HgO). All potentials versus Hg/HgO were calibrated to reversible hydrogen electrode (RHE) according to the following equation:  $E$  (vs. RHE) =  $E$  (vs. Hg/HgO) + 0.098 V + 0.059 V × pH. Hydrogen peroxide selectivity and electron transfer number ( $n$ ) were calculated according to the following equations:

$$n = \frac{|4i_d|}{|i_d| + \frac{i_r}{N}}$$

$$H_2O_2(\%) = \frac{200i_r}{N|i_d| + i_r}$$

Where  $i_d$  is the disk current,  $i_r$  is the ring current, and  $N$  (0.37) is the collection efficiency.

#### 1.4 Photocatalytic reaction

The photocatalytic production of H<sub>2</sub>O<sub>2</sub> and FA was performed in a 50 mL double-shelled glass bottle at room temperature and under atmospheric pressure. The light source was a 300 W Xenon lamp ( $\lambda > 420$  nm, PLS-SXE300D, Beijing Perfectlight, China). In a typical photocatalytic reaction, 10 mg of photocatalyst was suspended in an 11.6 mM FFA aqueous solution. Before illumination, the suspension was bubbled with O<sub>2</sub> for 30 mins to ensure O<sub>2</sub> saturation. After one hour reaction, 1 mL of solution was extracted. Then, the concentration of H<sub>2</sub>O<sub>2</sub> was determined by adding 1 mL of 0.1 mol L<sup>-1</sup> potassium hydrogen phthalate (C<sub>8</sub>H<sub>5</sub>KO<sub>4</sub>) aqueous solution and 1 mL of 0.4 mol L<sup>-1</sup> potassium iodide (KI) aqueous solution. In acidic conditions, the H<sub>2</sub>O<sub>2</sub> generated oxidized the iodide anions to triiodide anions. This resulted in a strong

absorption peak at around 350 nm, which was observable with an ultraviolet spectrophotometer (UH5300, Japan).

### 1.5 Measurement of AQY and SCC

The apparent quantum yield (AQY) of the photocatalyst was measured under the irradiation of a 300 W Xenon lamp (PLS-SXE300D, Beijing Perfectlight, China) equipped with different band-pass filter. The average value of monochromatic light intensity at three representative points was obtained by PL-MW2000 optical radiometer. AQY were calculated according to the following equations:

$$\text{AQY} = \frac{(\text{Number of produced H}_2\text{O}_2 \text{ molecules}) * 2}{\text{Number of incident photons}} * 100\%$$

$$\text{AQY} = \frac{(M\text{H}_2\text{O}_2 * N_A * h * c) * 2}{S * P * T * \lambda} * 100\%$$

Where  $M$  = Yield of  $\text{H}_2\text{O}_2$  (mol)

$N_A$  (Avogadro constant) =  $6.02 * 10^{23} \text{ mol}^{-1}$

$h$  (Planck constant) =  $6.626 * 10^{-34} \text{ J} \cdot \text{s}$

$c$  (Speed of light) =  $3 * 10^8 \text{ m/s}$

$S$  = Irradiation area ( $\text{cm}^2$ ) =  $2.0 \text{ cm}^2$

$P$  = the intensity of irradiation light ( $\text{W/cm}^2$ ) =  $13.6 \text{ mW/cm}^2$  (420 nm)

$T$  = the photoreaction time (s) = 3600 s

$\lambda$  = the wavelength of the monochromatic light (nm) =  $420 * 10^{-9} \text{ m}$

The solar-to-chemical energy conversion (SCC) efficiency was determined by the photocatalytic experiments using a 300 W Xenon lamp (PLS-SXE300D, Beijing

Perfectlight, China) equipped with a 420 nm band-pass filter. The SCC efficiency was calculated according to the following equations:

$$\text{SCC (\%)} = \frac{[\Delta G \text{ for H}_2\text{O}_2 \text{ formation (J mol}^{-1}\text{)] * [H}_2\text{O}_2 \text{ formed (mol)]}{[\text{Total input power (W)] * [\text{Reaction time (s)}]} * 100\%$$

Where  $\Delta G$  was 117 kJ mol<sup>-1</sup>, the light power intensity was 13.6 mW cm<sup>-2</sup>, the irradiation area was 2.0 cm<sup>2</sup>, and the irradiation time was 3600 s.

## 1.6 Theoretical computation details

The first principles computations were carried out by Vienna Ab initio Simulation Package (VASP) based on density functional theory. Generalized gradient approximation (GGA) with the Perdew-Burke-Ernzerhof (PBE) functional was used to describe the exchange-correlation interaction. The projector augmented wave pseudopotentials were adopted to describe the ion-electron with a cutoff energy of 500 eV. The electronic energy and forces were converged to within 10<sup>-5</sup> eV and 0.03 eVÅ<sup>-1</sup>, respectively. For the DFT calculations, the free energies of species were calculated as:  $G = E_{\text{DFT}} + E_{\text{ZPE}} - T\Delta S$ , where  $E_{\text{DFT}}$  was obtained from DFT energy,  $E_{\text{ZPE}}$  and  $T\Delta S$  of adsorbed species were calculated by vibration analysis, whereas the thermodynamic corrections for gas molecules were from standard database.

## 2. Synthetic procedures

### 2.1 Synthesis of NQ-COF<sub>S1</sub>

A Pyrex glass tube (10 mL) was charged with benzo[1,2-b:3,4-b':5,6-b'']trithiophene-2,5,8-tricarbaldehyde (33 mg, 0.10 mmol), 1,3,5-tris(4-aminophenyl)benzene (35 mg, 0.10 mmol), 1,3-dioxol-2-one (36 μL), MgSO<sub>4</sub> (72 mg), [Cp\*RhCl<sub>2</sub>]<sub>2</sub> (5 mg), *o*-dichlorobenzene (1.0 mL), and acetic acid (50 μL).

Subsequently, the tube was sonicated for 10 minutes, degassed by three freeze-pump-thaw cycles (liquid nitrogen), and sealed under vacuum. After being heated in an oven at 120 °C for 3 days, the cooled suspension was centrifuged to separate the solid, which was repeatedly washed by tetrahydrofuran (THF), MeOH, and water until the solvent was colorless. The **NQ-COF<sub>S1</sub>** was finally obtained as a sepia powder after being dried under vacuum at 80 °C.

## 2.2 Synthesis of **NQ-COF<sub>S1</sub>-O**

A 10 mL Schlenk pressure tube was charged with **NQ-COF<sub>S1</sub>** (35.2 mg, 0.05 mmol theoretical content of quinoline linkage), *m*-CPBA (51.8 mg, 0.3 mmol), and dichloromethane (DCM, 3.0 mL). Subsequently, the reaction mixture was stirred at 0 °C for 1 h, and then reacted at room temperature for 12 h. The solid was separated by filtration under reduced pressure, and washed with distilled water, THF, and DCM successively. Finally, **NQ-COF<sub>S1</sub>-O** (33.7 mg) was obtained as a red brown powder after being dried under vacuum at 80 °C.



### 3. Characterization

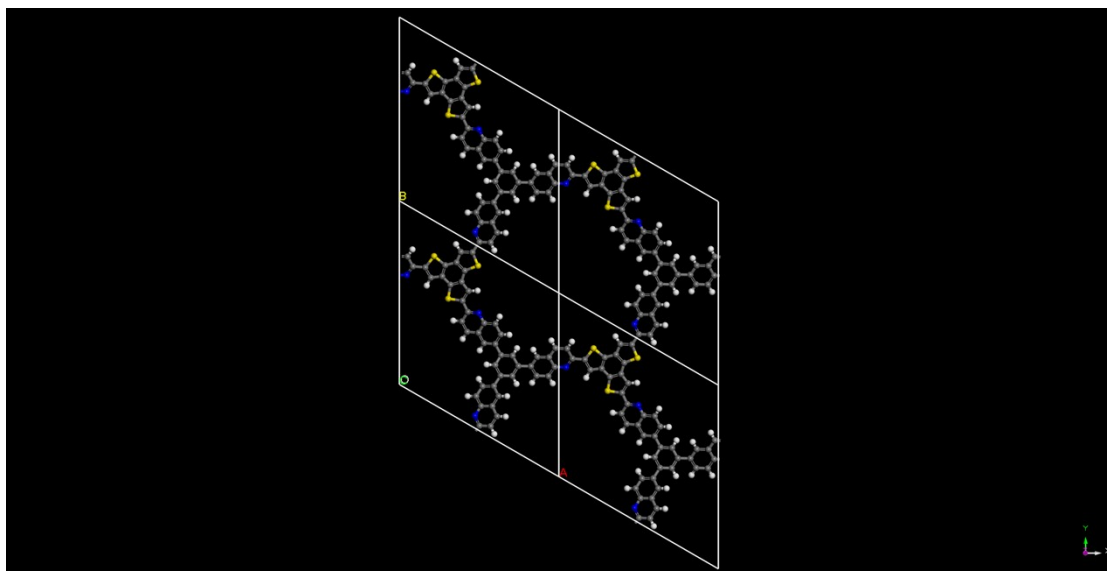

**Fig. S1** AA-stacking structure of NQ-COF<sub>S1</sub>.

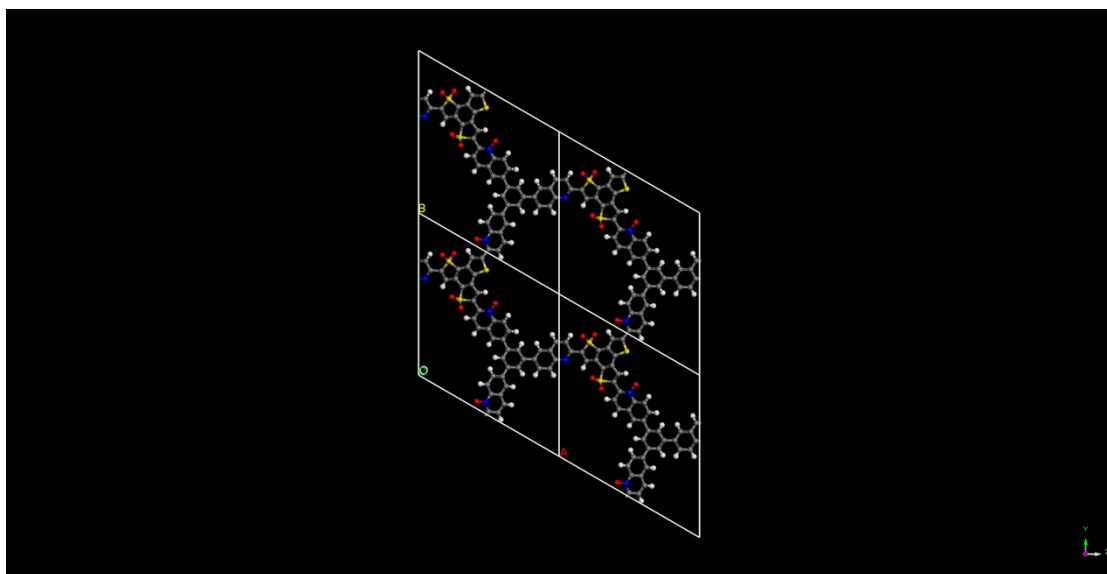

**Fig. S2** AA-stacking structure of NQ-COF<sub>S1</sub>-O.

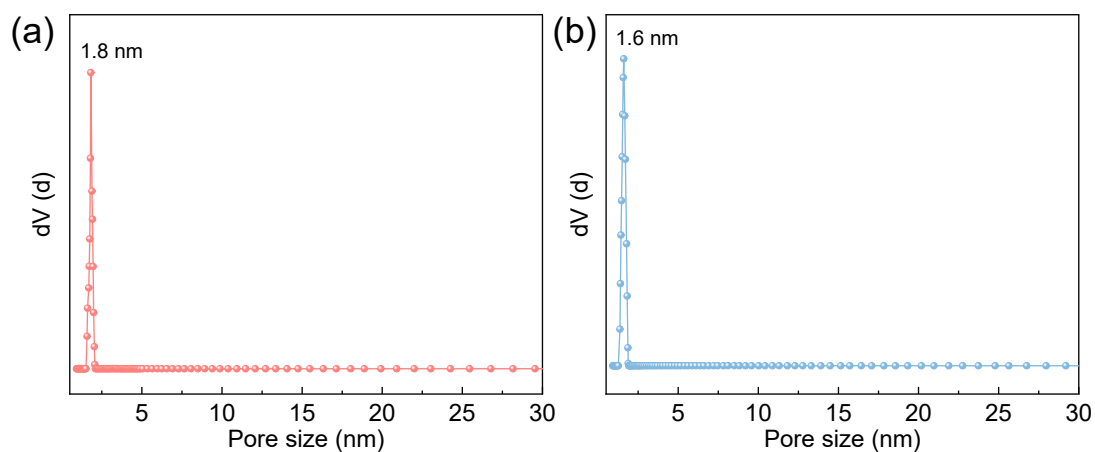

**Fig. S3** Pore size distribution plots of (a) NQ-COF<sub>S1</sub> and (b) NQ-COF<sub>S1</sub>-O.

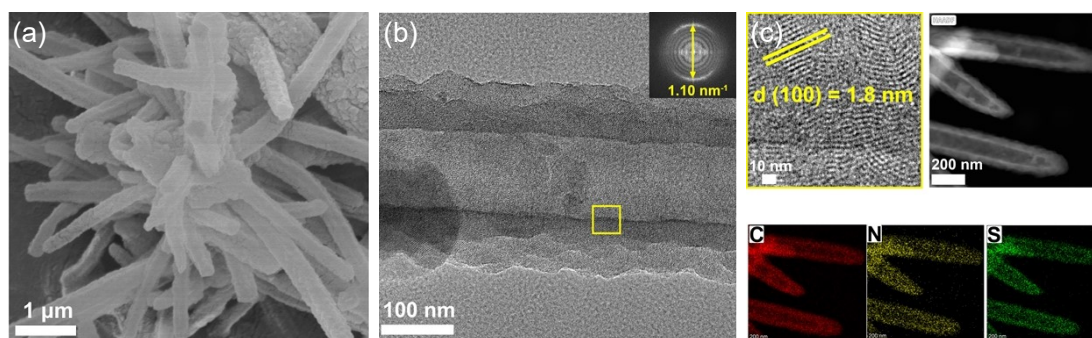

**Fig. S4** a) SEM and b) TEM images of NQ-COF<sub>S1</sub>. c) Partial enlargement of b) and elemental mapping images of NQ-COF<sub>S1</sub>.

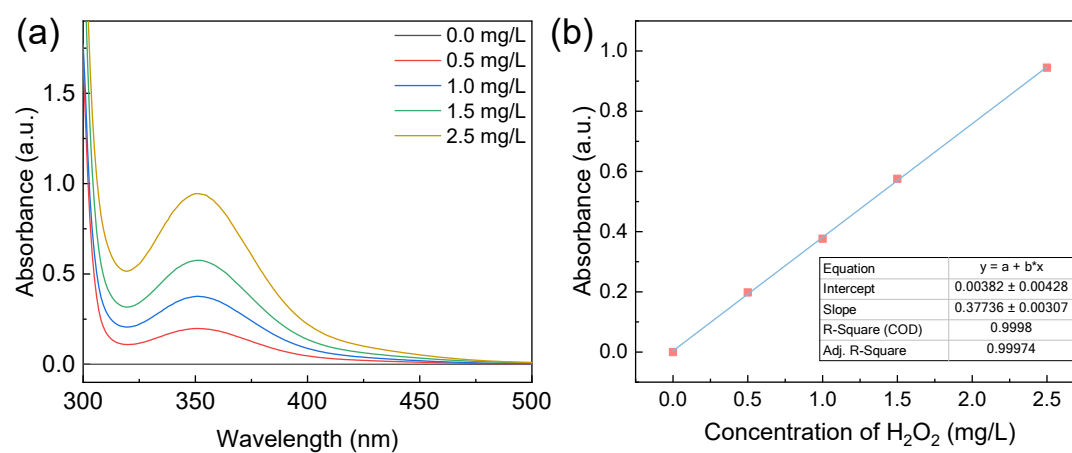

**Fig. S5** a) The absorption spectra of H<sub>2</sub>O<sub>2</sub> with different concentrations at wavelengths of 300-500 nm. b) The corresponding standard curve.

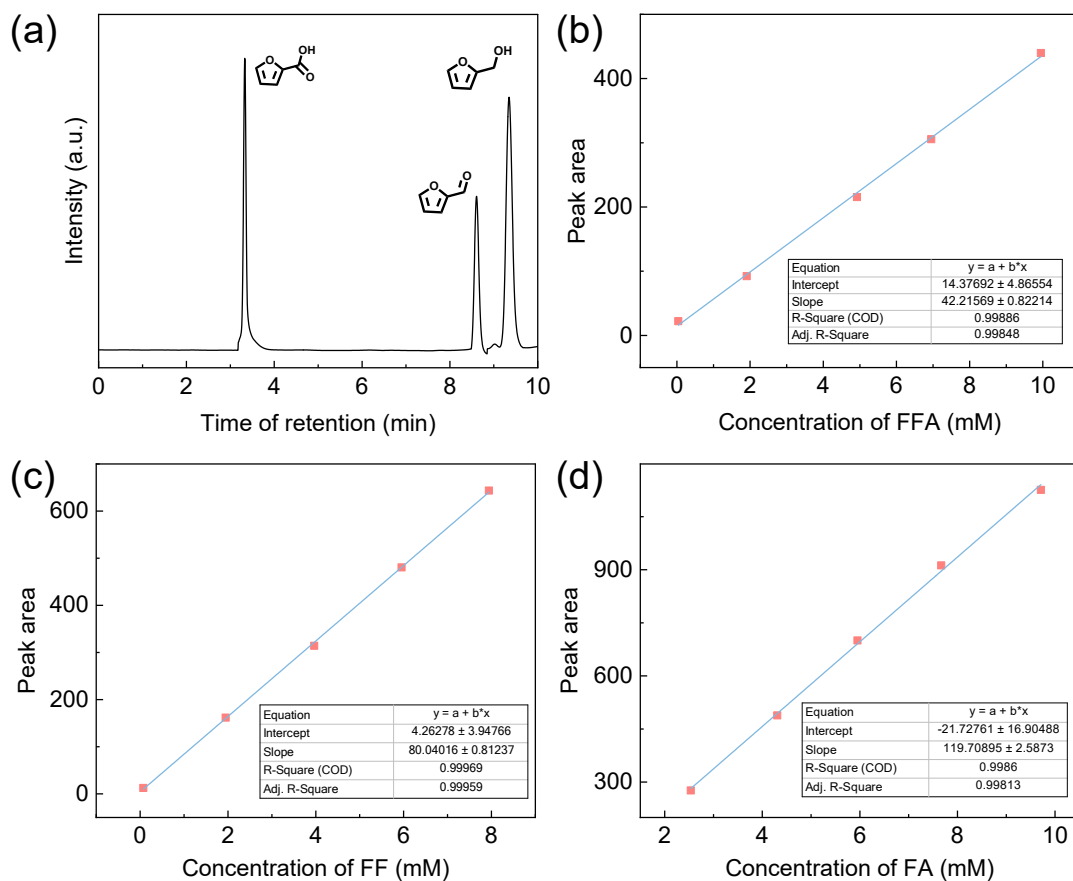

**Fig. S6** a) HPLC spectra of FFA, FF, and FA standards. The standard curves of b) FFA, c) FF, and d) FA.

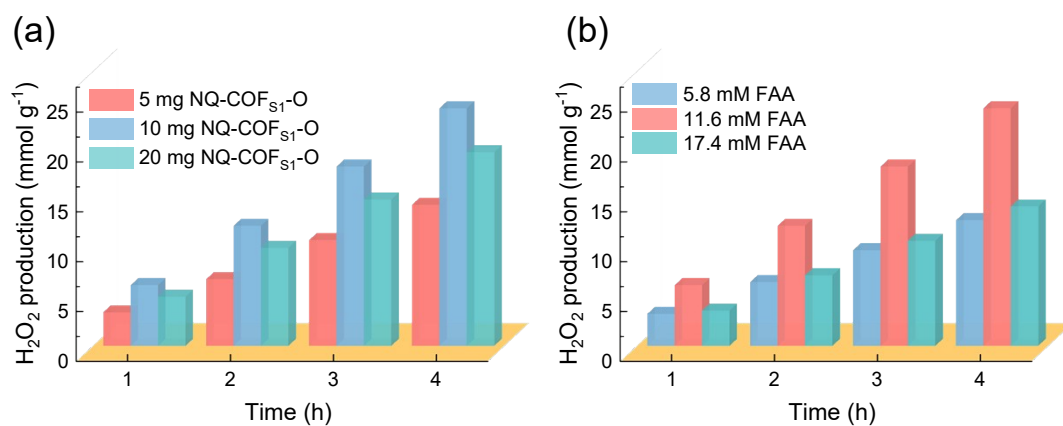

**Fig. S7** a) Photocatalytic  $H_2O_2$  production in 11.6 mM FFA solution with different dosages of NQ-COF<sub>51</sub>-O. b) Photocatalytic  $H_2O_2$  production in different concentration of FFA solutions with 10 mg of NQ-COF<sub>51</sub>-O.

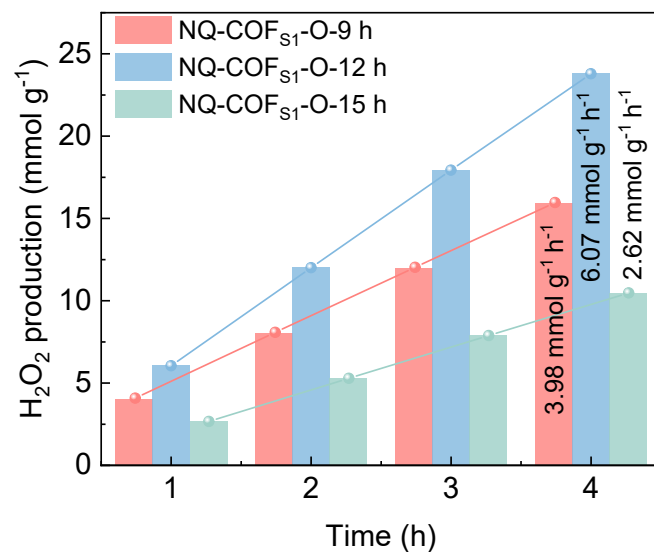

**Fig. S8** Photocatalytic H<sub>2</sub>O<sub>2</sub> production in 11.6 mM FFA solution over NQ-COF<sub>S1</sub>-O with different oxidation degrees. Note that NQ-COF<sub>S1</sub>-O with varying degrees of oxidation were prepared by adjusting the oxidation reaction time (9, 12, and 15 hours), yielding the samples labeled as NQ-COF<sub>S1</sub>-O-9h, NQ-COF<sub>S1</sub>-O-12h, and NQ-COF<sub>S1</sub>-O-15h, respectively

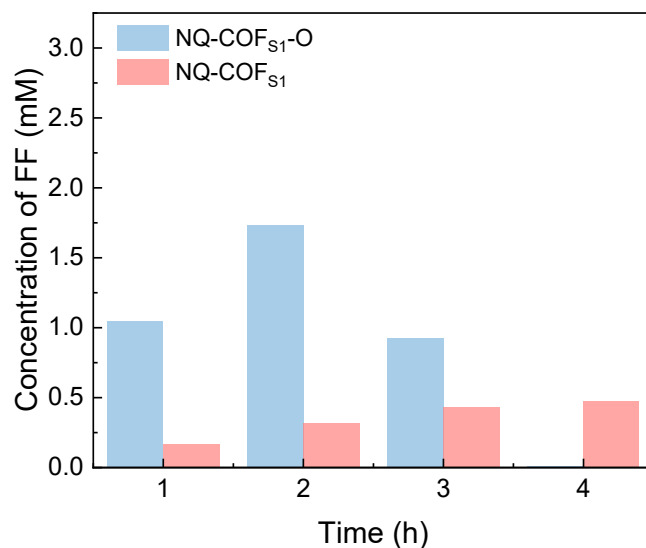

**Fig. S9** Photocatalytic FF production over NQ-COF<sub>S1</sub> and NQ-COF<sub>S1</sub>-O in 11.6 mM FFA solution.

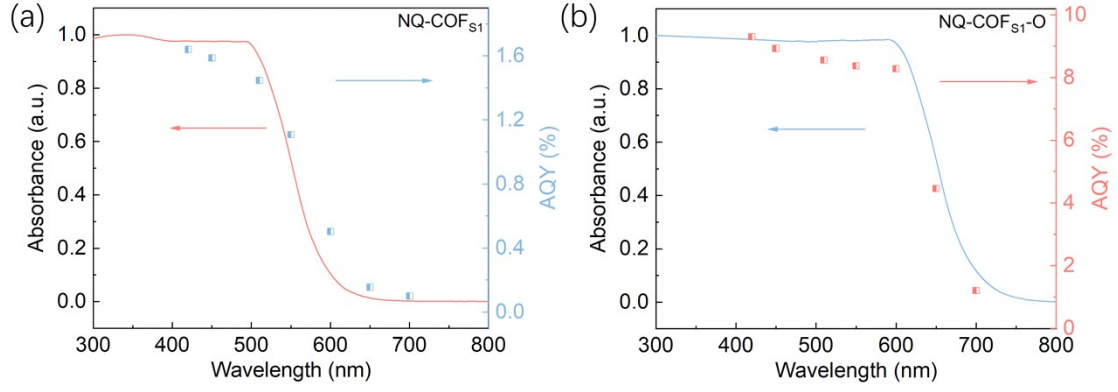

**Fig. S10** Wavelength-dependent H<sub>2</sub>O<sub>2</sub> apparent quantum yield (AQY) on (a) NQ-COF<sub>S1</sub> and (b) NQ-COF<sub>S1</sub>-O.

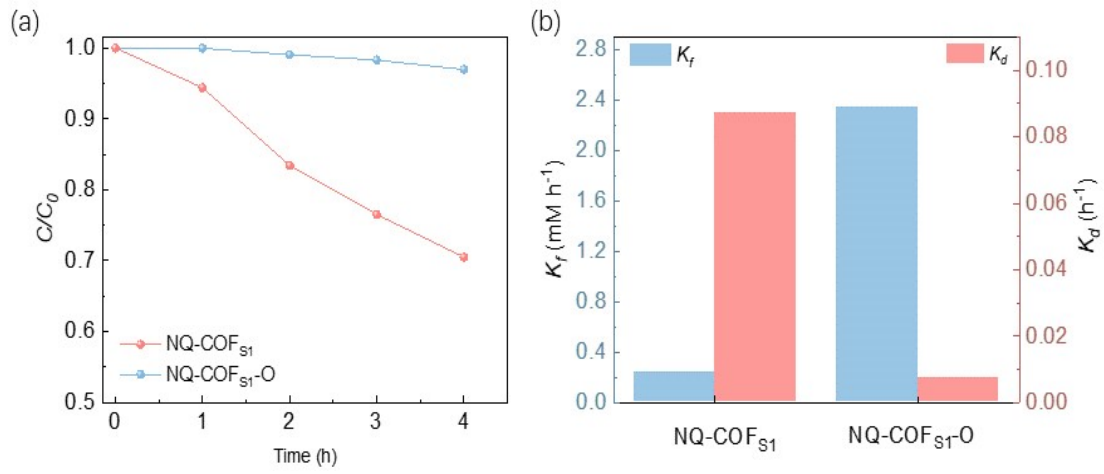

**Fig. S11** a) H<sub>2</sub>O<sub>2</sub> decomposition curves under light irradiation. b) H<sub>2</sub>O<sub>2</sub> formation rate constant ( $K_f$ ) and decomposition rate constant ( $K_d$ ).

The kinetic parameters, specifically the first-order kinetics formation rate constant ( $K_f$ ) and the zero-order kinetics decomposition rate constant ( $K_d$ ), are calculated by analyzing the H<sub>2</sub>O<sub>2</sub> formation and decomposition data. The values of  $K_f$  and  $K_d$  are estimated by the equation as follows:

$$[\text{H}_2\text{O}_2] = \frac{K_f}{K_d} \times (1 - e^{-K_d t})$$

$$K_d = \frac{-\ln(c_t/c_0)}{t}$$

Where  $c_t$  and  $c_0$  are the H<sub>2</sub>O<sub>2</sub> concentration at  $t$  and initial time, respectively.

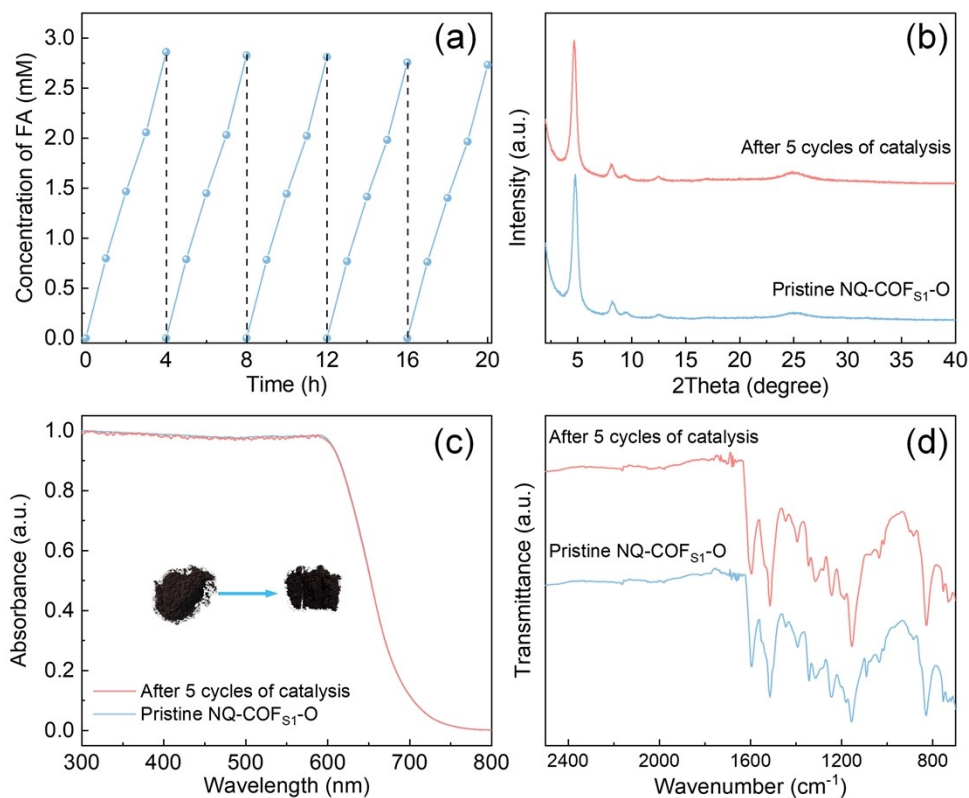

**Fig. S12** a) Recycling FA production over NQ-COF<sub>S1</sub>-O. b) PXRD patterns, c) UV-vis DRS spectra, and d) FT-IR spectra of NQ-COF<sub>S1</sub>-O before and after five cycles of photocatalysis.

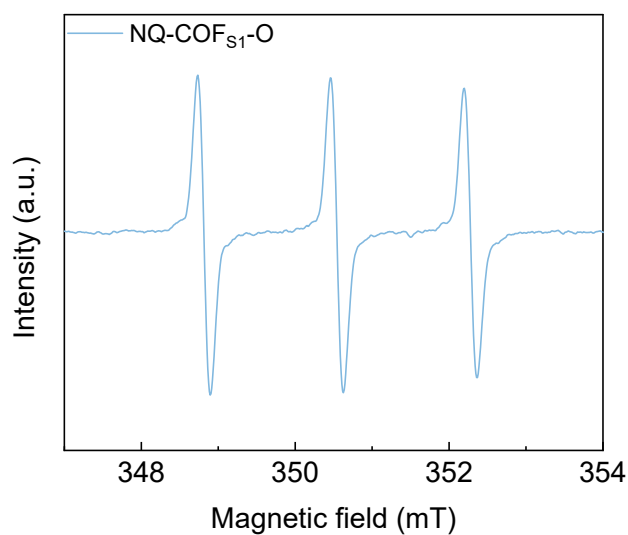

**Fig. S13** <sup>1</sup>O<sub>2</sub> trapped by TEMP over NQ-COF<sub>S1</sub>-O under light.

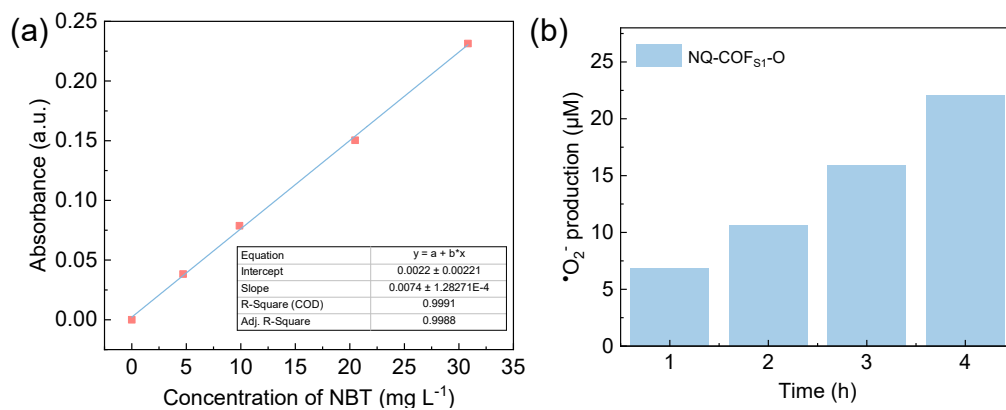

**Fig. S14** Quantitative measurement of  $\bullet\text{O}_2^-$ .

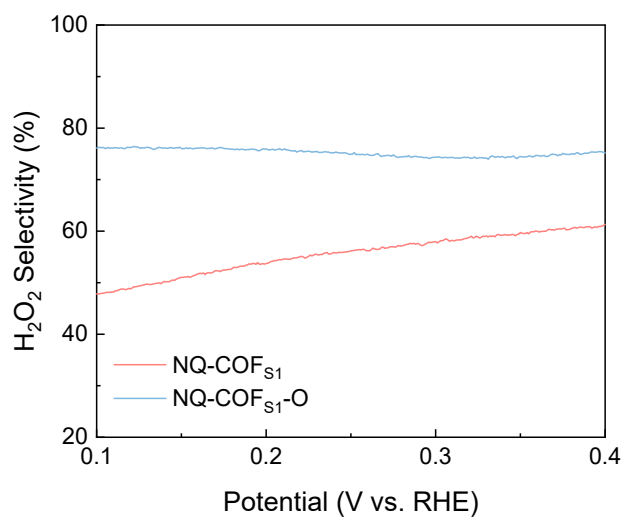

**Fig. S15** The dependence of  $\text{H}_2\text{O}_2$  selectivity on the potential.

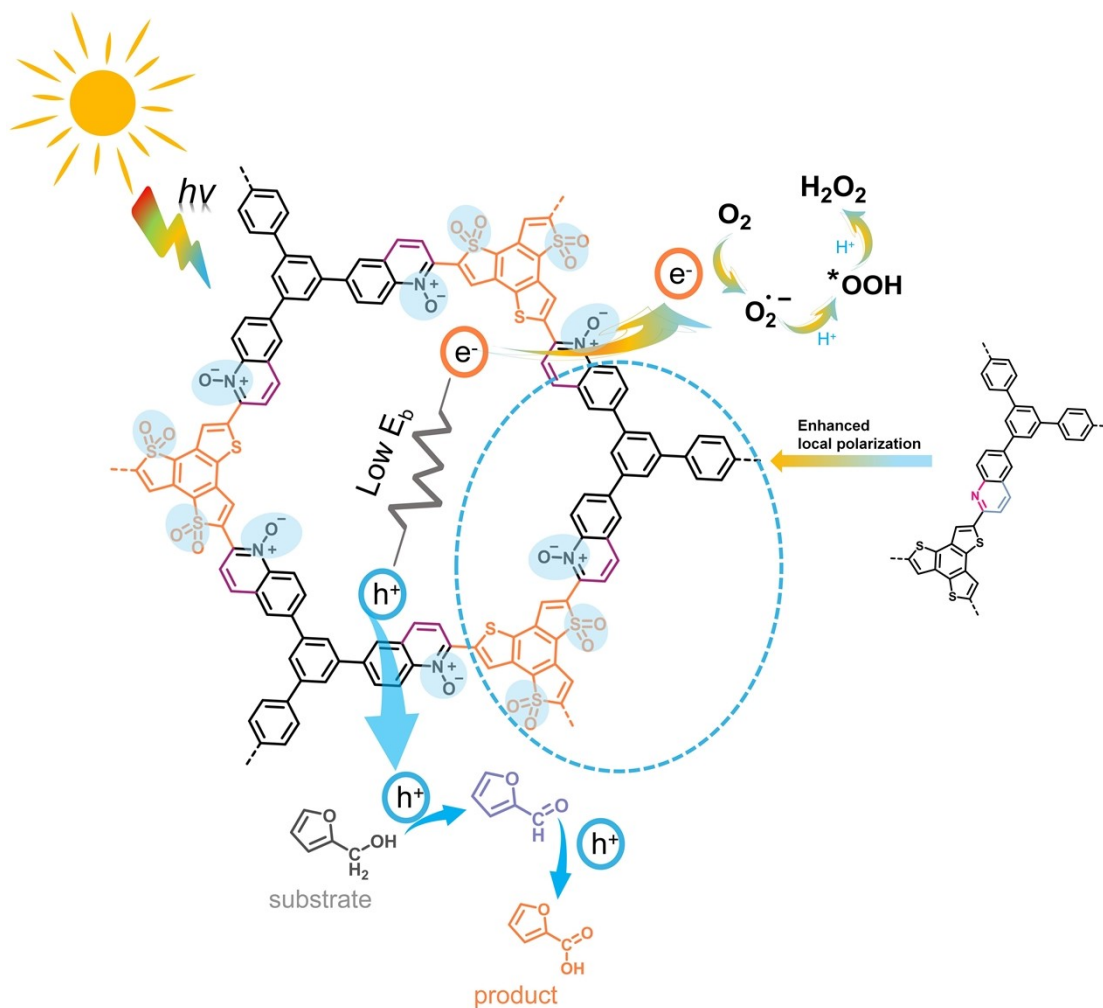

**Fig. S16** Proposed mechanism of photocatalytic  $H_2O_2$  production and FFA oxidation by NQ-COF<sub>S1</sub>-O.

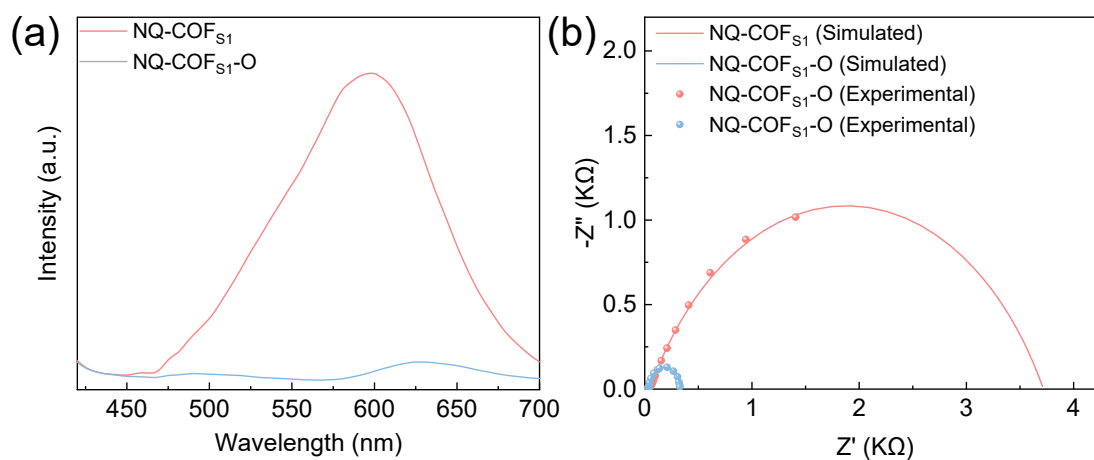

**Fig. S17** a) PL spectra and b) Nyquist plots of NQ-COF<sub>S1</sub> and NQ-COF<sub>S1</sub>-O.



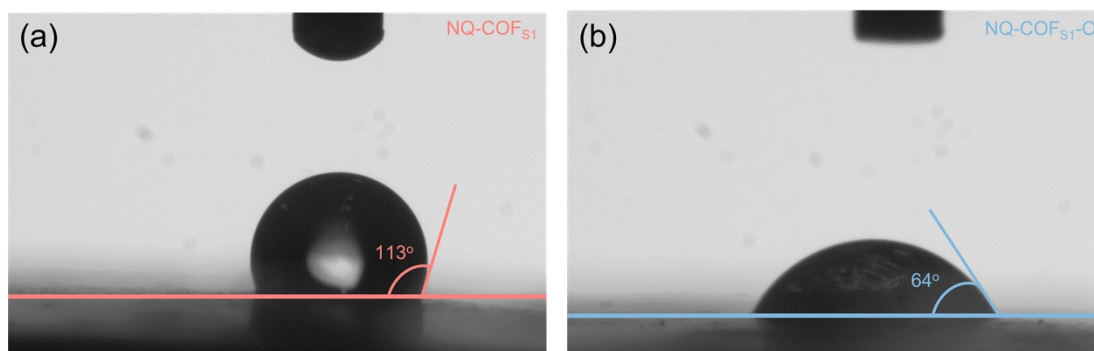

**Fig. S18** Water contact angles of a) NQ-COF<sub>S1</sub> and b) NQ-COF<sub>S1</sub>-O.

**Table S1** Atomistic coordinates of AA stacking for NQ-COF<sub>S1</sub> optimized by using Materials Studio method.

| Atom | $x/a$   | $y/b$   | $z/c$    |
|------|---------|---------|----------|
| C1   | 0.28623 | 0.79233 | -0.73856 |
| C2   | 0.26749 | 0.72254 | -0.79883 |
| C3   | 0.31925 | 0.70280 | -0.81046 |
| C4   | 0.38926 | 0.75344 | -0.75722 |
| C5   | 0.40864 | 0.82427 | -0.69568 |
| C6   | 0.35726 | 0.84336 | -0.68971 |
| S7   | 0.49226 | 0.89301 | -0.63144 |
| C8   | 0.45742 | 0.94837 | -0.60228 |
| C9   | 0.38486 | 0.91435 | -0.63713 |
| S10  | 0.21703 | 0.80715 | -0.72380 |
| C11  | 0.16164 | 0.71781 | -0.79709 |
| C12  | 0.19616 | 0.67959 | -0.83551 |
| S13  | 0.30507 | 0.61958 | -0.88456 |
| C14  | 0.39479 | 0.65342 | -0.84337 |
| C15  | 0.43274 | 0.72545 | -0.77505 |
| C16  | 0.08398 | 0.68442 | -0.80459 |
| N17  | 0.04392 | 0.61630 | -0.92276 |
| C18  | 0.60026 | 0.40634 | -0.72046 |
| C19  | 0.63352 | 0.36567 | -0.73916 |
| C20  | 0.70656 | 0.40039 | -0.80503 |
| C21  | 0.74527 | 0.47377 | -0.86827 |
| C22  | 0.70886 | 0.51143 | -0.88360 |
| C23  | 0.63689 | 0.47879 | -0.80102 |
| C24  | 0.60010 | 0.52045 | -0.79612 |
| C25  | 0.59116 | 0.28707 | -0.70269 |
| C26  | 0.82370 | 0.51193 | -0.90269 |
| C27  | 0.63507 | 0.59095 | -0.67050 |
| C28  | 0.60070 | 0.63023 | -0.66490 |
| C29  | 0.53081 | 0.59960 | -0.77937 |

|     |         |         |          |
|-----|---------|---------|----------|
| C30 | 0.49477 | 0.52890 | -0.90289 |
| C31 | 0.52964 | 0.48994 | -0.91436 |
| C32 | 0.85942 | 0.47819 | -1.04287 |
| C33 | 0.93313 | 0.51318 | -1.04915 |
| C34 | 0.97234 | 0.58271 | -0.92326 |
| C35 | 0.93746 | 0.61797 | -0.79419 |
| C36 | 0.86389 | 0.58241 | -0.77936 |
| C37 | 0.52049 | 0.25053 | -0.82354 |
| C38 | 0.48069 | 0.17698 | -0.80559 |
| C39 | 0.51103 | 0.13824 | -0.67792 |
| C40 | 0.58172 | 0.17334 | -0.55858 |
| C41 | 0.62106 | 0.24747 | -0.56468 |
| C42 | 0.42865 | 0.60961 | -0.87000 |
| N43 | 0.49729 | 0.63764 | -0.76729 |
| C44 | 0.50089 | 0.02606 | -0.57212 |
| N45 | 0.47293 | 0.06659 | -0.67951 |
| C46 | 0.57107 | 1.05899 | -0.45042 |
| C47 | 0.61137 | 1.13282 | -0.44094 |
| C48 | 1.05071 | 1.72150 | -1.68259 |
| C49 | 0.97742 | 1.68807 | -1.67583 |
| C50 | 1.39110 | 1.53930 | -2.99425 |
| C51 | 1.42434 | 1.49900 | -3.01185 |
| H52 | 0.35405 | 0.94053 | -0.62949 |
| H53 | 0.17026 | 0.62310 | -0.88022 |
| H54 | 0.48931 | 0.75577 | -0.74067 |
| H55 | 0.54567 | 0.38170 | -0.63828 |
| H56 | 0.73333 | 0.37036 | -0.80664 |
| H57 | 0.73651 | 0.56647 | -0.96309 |
| H58 | 0.68852 | 0.61525 | -0.56771 |
| H59 | 0.62777 | 0.68412 | -0.56471 |
| H60 | 0.50227 | 0.43647 | -1.02065 |
| H61 | 0.83069 | 0.42513 | -1.15294 |
| H62 | 0.95994 | 0.48664 | -1.15570 |
| H63 | 0.83848 | 0.60918 | -0.65817 |
| H64 | 0.49635 | 0.27842 | -0.94604 |
| H65 | 0.42688 | 0.14962 | -0.90415 |
| H66 | 0.67444 | 0.27375 | -0.46068 |
| H67 | 0.59402 | 1.02762 | -0.36120 |
| H68 | 0.66538 | 1.15802 | -0.34528 |
| H69 | 1.08113 | 1.77533 | -1.58424 |
| H70 | 0.95212 | 1.71647 | -1.57369 |
| H71 | 1.33675 | 1.51621 | -3.08065 |
| H72 | 1.39534 | 1.44502 | -3.11084 |

---

**Table S2** Atomistic coordinates of AA stacking for NQ-COF<sub>S1</sub>-O optimized by using Materials Studio method.

| Atom | $x/a$   | $y/b$   | $z/c$    |
|------|---------|---------|----------|
| C1   | 0.27999 | 0.79261 | -0.65600 |
| C2   | 0.26295 | 0.72456 | -0.76087 |
| C3   | 0.31040 | 0.69948 | -0.68408 |
| C4   | 0.37642 | 0.74702 | -0.54778 |
| C5   | 0.39702 | 0.81879 | -0.49171 |
| C6   | 0.34884 | 0.84115 | -0.54901 |
| S7   | 0.48107 | 0.88667 | -0.41276 |
| C8   | 0.45062 | 0.94571 | -0.46383 |
| C9   | 0.37886 | 0.91319 | -0.53446 |
| S10  | 0.21441 | 0.80837 | -0.84083 |
| C11  | 0.16175 | 0.72185 | -1.03719 |
| C12  | 0.19449 | 0.68499 | -0.96457 |
| S13  | 0.29334 | 0.61107 | -0.82907 |
| C14  | 0.39014 | 0.65261 | -0.69990 |
| C15  | 0.42091 | 0.71700 | -0.54699 |
| C16  | 0.08383 | 0.68708 | -1.08826 |
| N17  | 0.04384 | 0.61510 | -1.10538 |
| C18  | 0.59973 | 0.40427 | -0.74069 |
| C19  | 0.63523 | 0.36552 | -0.69853 |
| C20  | 0.70885 | 0.40115 | -0.76390 |
| C21  | 0.74537 | 0.47122 | -0.89820 |
| C22  | 0.70690 | 0.50626 | -0.95192 |
| C23  | 0.63566 | 0.47535 | -0.85249 |
| C24  | 0.60075 | 0.51933 | -0.84543 |
| C25  | 0.59556 | 0.28832 | -0.58994 |
| C26  | 0.82365 | 0.50895 | -0.97229 |
| C27  | 0.63918 | 0.59033 | -0.73083 |
| C28  | 0.60698 | 0.63167 | -0.70563 |
| C29  | 0.53508 | 0.60313 | -0.78702 |
| C30  | 0.49634 | 0.53220 | -0.90503 |
| C31  | 0.52907 | 0.49096 | -0.93702 |
| C32  | 0.85924 | 0.47150 | -1.05176 |
| C33  | 0.93280 | 0.50708 | -1.09997 |
| C34  | 0.97200 | 0.58065 | -1.08270 |
| C35  | 0.93695 | 0.61906 | -1.02589 |
| C36  | 0.86402 | 0.58348 | -0.96128 |
| C37  | 0.52935 | 0.25854 | -0.41134 |
| C38  | 0.48960 | 0.18599 | -0.33920 |
| C39  | 0.51486 | 0.14060 | -0.43625 |
| C40  | 0.58213 | 0.16961 | -0.60186 |

|     |         |         |          |
|-----|---------|---------|----------|
| C41 | 0.62155 | 0.24247 | -0.68047 |
| C42 | 0.43093 | 0.61406 | -0.79697 |
| N43 | 0.50288 | 0.64304 | -0.74803 |
| C44 | 0.49800 | 0.02398 | -0.48260 |
| N45 | 0.47514 | 0.06930 | -0.37240 |
| C46 | 0.56578 | 1.05179 | -0.63590 |
| C47 | 0.60777 | 1.12442 | -0.69471 |
| C48 | 1.04959 | 1.72679 | -2.06561 |
| C49 | 0.97632 | 1.69280 | -2.02764 |
| C50 | 1.39309 | 1.54439 | -2.93886 |
| C51 | 1.42536 | 1.50398 | -2.99064 |
| H52 | 0.35072 | 0.94117 | -0.59541 |
| H53 | 0.17038 | 0.62901 | -1.02227 |
| H54 | 0.47389 | 0.74655 | -0.44129 |
| H55 | 0.54413 | 0.37999 | -0.68314 |
| H56 | 0.73819 | 0.37502 | -0.69933 |
| H57 | 0.73190 | 0.55825 | -1.07372 |
| H58 | 0.69390 | 0.61359 | -0.64878 |
| H59 | 0.63740 | 0.68576 | -0.61115 |
| H60 | 0.49877 | 0.43709 | -1.03458 |
| H61 | 0.83061 | 0.41467 | -1.07749 |
| H62 | 0.95969 | 0.47768 | -1.15022 |
| H63 | 0.83995 | 0.61462 | -0.89018 |
| H64 | 0.50797 | 0.29092 | -0.31817 |
| H65 | 0.43868 | 0.16454 | -0.20544 |
| H66 | 0.67086 | 0.26216 | -0.82771 |
| H67 | 0.58452 | 1.01671 | -0.72468 |
| H68 | 0.65904 | 1.14483 | -0.82377 |
| H69 | 1.07988 | 1.78394 | -2.06208 |
| H70 | 0.95081 | 1.72399 | -1.99303 |
| H71 | 1.33772 | 1.51996 | -3.00657 |
| H72 | 1.39446 | 1.45040 | -3.09313 |
| O73 | 0.41170 | 1.04299 | 0.81224  |
| O74 | 0.25143 | 0.87496 | -0.08552 |
| O75 | 0.16750 | 0.82305 | 0.42004  |
| O76 | 0.23577 | 0.59886 | 0.45696  |
| O77 | 0.29953 | 0.56479 | 0.47286  |
| O78 | 0.54545 | 0.71399 | 0.32097  |

---

**Table S3** Comparison of H<sub>2</sub>O<sub>2</sub> production performance for different COF photocatalysts reported in the literatures.

| Entry | COFs                           | Reaction medium                       | Irradiation (nm)         | H <sub>2</sub> O <sub>2</sub> yield (μmol h <sup>-1</sup> g <sup>-1</sup> ) | AQY              | SCC                    | Ref |
|-------|--------------------------------|---------------------------------------|--------------------------|-----------------------------------------------------------------------------|------------------|------------------------|-----|
| 1     | TF <sub>50</sub> -COF (5 mg)   | H <sub>2</sub> O: EtOH (9: 1) (50 mL) | λ > 400<br>300 W Xe lamp | 1739                                                                        | 5.1% at 400 nm   | 0.17 at AM 1.5G        | 1]  |
| 2     | TTF-BT-COF (50 mg)             | H <sub>2</sub> O (100 mL)             | λ > 420<br>300 W Xe lamp | 2760                                                                        | 11.19% at 420 nm | 0.49 at 420 nm         | 2   |
| 3     | TPB-DMTP-COF (10 mg)           | H <sub>2</sub> O (50 mL)              | λ > 420<br>300 W Xe lamp | 1565                                                                        | 18.4% at 420 nm  | 0.76% at AM 1.5G       | 3   |
| 4     | Py-Da-COF (5 mg)               | H <sub>2</sub> O: BA (9: 1) (5 mL)    | λ > 420<br>300 W Xe lamp | 1242                                                                        | 4.5% at 420 nm   | 0.09% at AM 1.5G       | 4   |
| 5     | HEP-TAPT-COF (50 mg)           | H <sub>2</sub> O (100 mL)             | λ > 420<br>300 W Xe lamp | 1750                                                                        | 15.35% at 420 nm | 0.65% at AM 1.5G       | 5   |
| 6     | Bpy-TAPT (5 mg)                | H <sub>2</sub> O (30 mL)              | λ > 420<br>300 W Xe lamp | 4038                                                                        | 8.6% at 420 nm   | 0.65% at AM 1.5G       | 6   |
| 7     | TDB-COF (10 mg)                | H <sub>2</sub> O (10 mL)              | AM 1.5G<br>300 W Xe lamp | 723                                                                         | 1.4% at 365 nm   | 0.39% at AM 1.5G       | 7   |
| 8     | CHF-DPDA (40 mg)               | H <sub>2</sub> O (20 mL)              | λ > 420<br>300 W Xe lamp | 1725                                                                        | 16% at 420 nm    | 0.78% at AM 1.5G       | 8   |
| 9     | Cu <sub>3</sub> -BT-COF (5 mg) | 11.6 mM FFA                           | 300 W Xe lamp            | 1168                                                                        | 7.98% at 420 nm  | 0.62% at 420 nm        | 9   |
| 10    | COF-TfpBpy (15 mg)             | H <sub>2</sub> O (10 mL)              | λ > 420<br>300 W Xe lamp | 2084                                                                        | 13.6% at 420 nm  | 1.08% at 420 nm        | 10  |
| 11    | TaptBtt (15 mg)                | H <sub>2</sub> O (50 mL)              | λ > 420<br>300 W Xe lamp | 1407                                                                        | 4.6% at 450 nm   | 0.296% at AM 1.5G      | 11  |
| 12    | TpDz (3 mg)                    | H <sub>2</sub> O (18 mL)              | λ > 420<br>300 W Xe lamp | 7327                                                                        | 11.9% at 420 nm  | 0.62% at λ > 420 nm    | 12  |
| 13    | TAPT-TFPA COFs@Pd ICs (10 mg)  | H <sub>2</sub> O: EtOH (9: 1) (20 mL) | AM 1.5G<br>300 W Xe lamp | 2143                                                                        | 6.5% at 400 nm   | 0.82% at AM 1.5G       | 13  |
| 14    | TZ-COF (15 mg)                 | H <sub>2</sub> O: BA (1: 1) (30 mL)   | λ > 420<br>300 W Xe lamp | 4951                                                                        | 0.6% at 475 nm   | 0.036% at AM 1.5G      | 14  |
| 15    | COF-N32 (10 mg)                | H <sub>2</sub> O (50 mL)              | λ > 420<br>300 W Xe lamp | 605                                                                         | 6.2% at 459 nm   | 0.31% at 300 W Xe lamp | 15  |
| 16    | CTF-BDDBN (30 mg)              | H <sub>2</sub> O (50 mL)              | λ > 420<br>300 W Xe lamp | 997                                                                         | -                | 0.14% at AM 1.5G       | 16  |
| 17    | Kf-AQ (5 mg)                   | Alkaline water (pH = 13, 30 mL)       | λ > 400<br>300 W Xe lamp | 4784                                                                        | 15.8% at 400 nm  | 0.7% at 400 nm         | 17  |

|    |                                 |                                          |                                  |       |                    |                                        |              |
|----|---------------------------------|------------------------------------------|----------------------------------|-------|--------------------|----------------------------------------|--------------|
| 18 | DVA-COF (10 mg)                 | H <sub>2</sub> O: BA<br>(9: 1) (20 mL)   | 420 nm LED                       | 8450  | 2.84% at<br>420 nm | 0.08% at<br>AM 1.5G                    | 18           |
| 19 | TAH-COF (5 mg)                  | H <sub>2</sub> O (50 mL)                 | $\lambda > 420$<br>300 W Xe lamp | 6003  | 7.72% at<br>500 nm | 0.66% at<br>AM 1.5G                    | 19           |
| 20 | <i>o</i> -COF-TpPzda (5 mg)     | H <sub>2</sub> O (40 mL)                 | $\lambda > 420$<br>300 W Xe lamp | 4396  | -                  | 0.46%                                  | 20           |
| 21 | TB-COF (1 mg)                   | Seawater<br>(8 mL)                       | 400-700 nm<br>white LED          | 4111  | 3.45% at<br>420 nm | 1.08% at<br>400-700<br>nm white<br>LED | 21           |
| 22 | FS-OHOMe-COF (10 mg)            | H <sub>2</sub> O (20 mL)                 | $\lambda > 420$<br>300 W Xe lamp | 10000 | 9.6% at<br>420 nm  | 0.58% at<br>AM 1.5G                    | 22           |
| 23 | SO <sub>3</sub> H-COF (5 mg)    | H <sub>2</sub> O: EtOH<br>(9: 1) (50 mL) | $\lambda > 400$<br>300 W Xe lamp | 4971  | 15% at<br>400 nm   | 0.4% at<br>AM 1.5G                     | 23           |
| 24 | Fe SAS-TpPP-COF (5 mg)          | H <sub>2</sub> O: EtOH<br>(9: 1) (50 mL) | $\lambda > 420$<br>300 W Xe lamp | 4130  | 6.4% at<br>420 nm  | 0.2% at<br>AM 1.5G                     | 24           |
| 25 | Tz-THBZ (10 mg)                 | H <sub>2</sub> O (50 mL)                 | $\lambda > 420$<br>300 W Xe lamp | 4688  | 5.5% at<br>420 nm  | 0.36% at<br>AM 1.5G                    | 25           |
| 26 | NQ-COF <sub>S1</sub> -O (10 mg) | 11.6 mM FFA                              | $\lambda > 420$<br>300 W Xe lamp | 6070  | 9.2% at<br>420 nm  | 0.61% at<br>420 nm                     | This<br>work |

#### 4. References

- 1 H. Wang, C. Yang, F. Chen, G. Zheng and Q. Han, *Angew. Chem. Int. Ed.*, 2022, **61**, e202202328.
- 2 J. N. Chang, Q. Li, J. W. Shi, M. Zhang, L. Zhang, S. Li, Y. Chen, S. L. Li and Y. Q. Lan, *Angew. Chem. Int. Ed.*, 2023, **62**, e202218868.
- 3 L. Li, L. Xu, Z. Hu and J. C. Yu, *Adv. Funct. Mater.*, 2021, **31**, 2106120.
- 4 J. Sun, H. Sekhar Jena, C. Krishnaraj, K. Singh Rawat, S. Abednatanzi, J. Chakraborty, A. Laemont, W. Liu, H. Chen, Y. Y. Liu, K. Leus, H. Vrielinck, V. Van Speybroeck and P. Van Der Voort, *Angew. Chem. Int. Ed.*, 2023, **62**, e202216719.
- 5 D. Chen, W. Chen, Y. Wu, L. Wang, X. Wu, H. Xu and L. Chen, *Angew. Chem. Int. Ed.*, 2023, **62**, e202217479.
- 6 Y. Liu, W.-K. Han, W. Chi, Y. Mao, Y. Jiang, X. Yan and Z.-G. Gu, *Appl. Catal. B Environ.*, 2023, **331**, 122691.
- 7 Z. Zhou, M. Sun, Y. Zhu, P. Li, Y. Zhang, M. Wang and Y. Shen, *Appl. Catal. B Environ.*, 2023, **334**, 122862.
- 8 H. Cheng, H. Lv, J. Cheng, L. Wang, X. Wu and H. Xu, *Adv. Mater.*, 2022, **34**, 2107480.
- 9 J. N. Chang, J. W. Shi, Q. Li, S. Li, Y. R. Wang, Y. Chen, F. Yu, S. L. Li and Y. Q. Lan, *Angew. Chem. Int. Ed.*, 2023, **62**, e202303606.
- 10 M. Kou, Y. Wang, Y. Xu, L. Ye, Y. Huang, B. Jia, H. Li, J. Ren, Y. Deng, J. Chen, Y. Zhou, K. Lei, L. Wang, W. Liu, H. Huang and T. Ma, *Angew. Chem. Int. Ed.*,

- 2022, **61**, e202200413.
- 11 C. Qin, X. Wu, L. Tang, X. Chen, M. Li, Y. Mou, B. Su, S. Wang, C. Feng, J. Liu, X. Yuan and Y. Zhao, H. Wang, *Nat. Commun.*, 2023, **14**, 5238.
  - 12 Q. Liao, Q. Sun, H. Xu, Y. Wang, Y. Xu, Z. Li, J. Hu, D. Wang, H. Li and K. Xi, *Angew. Chem. Int. Ed.*, 2023, **62**, e202310556.
  - 13 Y. Liu, L. Li, H. Tan, N. Ye, Y. Gu, S. Zhao, S. Zhang, M. Luo and S. Guo, *J. Am. Chem. Soc.*, 2023, **145**, 19877-19884.
  - 14 Y. Mou, X. Wu, C. Qin, J. Chen, Y. Zhao, L. Jiang, C. Zhang, X. Yuan, E. H. Ang and H. Wang, *Angew. Chem. Int. Ed.*, 2023, **62**, e202309480.
  - 15 F. Liu, P. Zhou, Y. Hou, H. Tan, Y. Liang, J. Liang, Q. Zhang, S. Guo, M. Tong and J. Ni, *Nat. Commun.*, 2023, **14**, 4344.
  - 16 L. Chen, L. Wang, Y. Wan, Y. Zhang, Z. Qi, X. Wu and H. Xu, *Adv. Mater.*, 2020, **32**, 1904433.
  - 17 X. Zhang, S. Cheng, C. Chen, X. Wen, J. Miao, B. Zhou, M. Long and L. Zhang, *Nat. Commun.*, 2024, **15**, 2649.
  - 18 H. Yu, F. Zhang, Q. Chen, P.-K. Zhou, W. Xing, S. Wang, G. Zhang, Y. Jiang and X. Chen, *Angew. Chem. Int. Ed.*, 2024, **63**, e202402297.
  - 19 T. Xu, Z. Wang, W. Zhang, S. An, L. Wei, S. Guo, Y. Huang, S. Jiang, M. Zhu, Y.-B. Zhang and W.-H. Zhu, *J. Am. Chem. Soc.*, 2024, **146**, 20107-20115.
  - 20 T. Yang, D. Zhang, A. Kong, Y. Zou, L. Yuan, C. Liu, S. Luo, G. Wei and C. Yu, *Angew. Chem. Int. Ed.*, 2024, **63**, e202404077.
  - 21 J.-Y. Yue, L.-P. Song, Z.-X. Pan, P. Yang, Y. Ma, Q. Xu and B. Tang, *ACS Catal.*,



- 2024, **14**, 4728-4737.
- 22 C. Shu, X. Yang, L. Liu, X. Hu, R. Sun, X. Yang, A. I. Cooper, B. Tan and X. Wang, *Angew. Chem. Int. Ed.*, 2024, **63**, e202403926.
- 23 L. Li, X. Lv, Y. Xue, H. Shao, G. Zheng and Q. Han, *Angew. Chem. Int. Ed.*, 2024, **63**, e202320218.
- 24 Z. Li, X. Shi, H. Cheng, Y. Song, Y. Jiao, S. Shi, J. Gao and J. Hou, *Adv. Energy Mater.*, 2024, **14**, 2302797.
- 25 C. Shu, P. Xie, X. Yang, X. Yang, H. Gao, B. Tan and X. Wang, *J. Mater. Chem. A.*, 2024, **12**, 25927-25933.
